# Supplementary material
Source: PubMed Central journal article supplement (PMC3397259)
Supplement: mmc1.pdf [file mmc1.pdf]

## Supplemental Data

### Mutations in *DPAGT1* Cause a Limb-Girdle Congenital

### Myasthenic Syndrome with Tubular Aggregates

Katsiaryna Belaya, Sarah Finlayson, Clarke R. Slater, Judith Cossins, Wei Wei Liu, Susan Maxwell, Simon J. McGowan, Siarhei Maslau, Stephen R.F. Twigg, Timothy J. Walls, Samuel I. Pascual Pascual, Jacqueline Palace, and David Beeson

Ethical approval for studies on congenital myasthenic syndromes was obtained from OXREC B: 04.OXB.017 and Oxfordshire REC C 09/H0606/74. The approvals include research and screening of DNA provided that this research and screening directly relates to congenital myasthenic syndromes.

Table S1. Analysis of Whole-Exome Sequencing Data

|                                                                                     | Number of Variants |        |                          |                                                                 |
|-------------------------------------------------------------------------------------|--------------------|--------|--------------------------|-----------------------------------------------------------------|
|                                                                                     | Case 1             | Case 2 | Shared between Two Cases | Shared between Two Cases, but Absent from Other In-House Exomes |
| All variants after filtering using dbSNP132 database                                | 1,574              | 1,287  |                          |                                                                 |
| Nonsynonymous changes, splicing mutations, changes in 3'UTRs and 5'UTRs             | 377                | 300    |                          |                                                                 |
| Genes with two or more compound heterozygous mutations or with homozygous mutations | 98                 | 69     | 34                       | 1 - <i>DPAGT1</i>                                               |

Table S2. Predicted Pathogenicity of *DPAGT1* Mutations

|        | DNA Mutation | Protein Alteration | Segregation in Family Members                                                                                             | PolyPhen2 Prediction | PolyPhen2 Score |
|--------|--------------|--------------------|---------------------------------------------------------------------------------------------------------------------------|----------------------|-----------------|
| Case 1 | c.324G>C     | p.Met108Ile        | Individual trans-heterozygous based on exome sequencing.                                                                  | probably damaging    | 0.957           |
|        | c.349G>A     | p.Val117Ile        | Individual trans-heterozygous based on exome sequencing.                                                                  | possibly damaging    | 0.802           |
| Case 2 | c.349G>A     | p.Val117Ile        | One heterozygous unaffected sibling.                                                                                      | possibly damaging    | 0.802           |
|        | c.699dup     | p.Thr234Hisfs*116  | Two heterozygous unaffected siblings.                                                                                     | frameshift insertion |                 |
| Case 3 | c.358C>A     | p.Leu120Met        | Heterozygous unaffected parent, one compound heterozygous affected sibling (Case 5).                                      | probably damaging    | 1               |
|        | c.791T>G     | p.Val264Gly        | Heterozygous unaffected parent, one heterozygous unaffected sibling, one compound heterozygous affected sibling (Case 5). | probably damaging    | 1               |
| Case 4 | c.478G>A     | p.Gly160Ser        | N/A                                                                                                                       | probably damaging    | 1               |
|        | c.574G>A     | p.Gly192Ser        | N/A                                                                                                                       | probably damaging    | 1               |
| Case 5 | c.358C>A     | p.Leu120Met        | Heterozygous unaffected parent, one compound heterozygous affected sibling (Case 3).                                      | probably damaging    | 1               |
|        | c.791T>G     | p.Val264Gly        | Heterozygous unaffected parent, one heterozygous unaffected sibling, one compound heterozygous affected sibling (Case 3). | probably damaging    | 1               |
